# Supplementary material for: Validation of the Spanish Versions of FACIT-PAL and FACIT-PAL-14 in Palliative Patients
Source: MDPI journal article supplement (doi:10.3390/ijerph191710731), 2022-08-29
Supplement: s1 [file s1]

**FACIT-Pal**

**A continuación, encontrará una lista de declaraciones que otras personas que padecen su misma enfermedad han considerado importantes. Por favor, rodee con un círculo o marque un número por fila para indicar su respuesta referida a los últimos 7 días.**

| <b><u>BIENESTAR FÍSICO</u></b> |                                                                          | <b>Nada</b> | <b>Algo</b> | <b>Un poco</b> | <b>Bastante</b> | <b>Mucho</b> |
|--------------------------------|--------------------------------------------------------------------------|-------------|-------------|----------------|-----------------|--------------|
| GP1                            | Me siento falto/a de energía .....                                       | 0           | 1           | 2              | 3               | 4            |
| GP2                            | Tengo nauseas .....                                                      | 0           | 1           | 2              | 3               | 4            |
| GP3                            | Mi condición física me impide cubrir las necesidades de mi familia ..... | 0           | 1           | 2              | 3               | 4            |
| GP4                            | Tengo dolores.....                                                       | 0           | 1           | 2              | 3               | 4            |
| GP5                            | Estoy preocupado/a por los efectos secundarios del tratamiento .....     | 0           | 1           | 2              | 3               | 4            |
| GP6                            | Me siento enfermo/a.....                                                 | 0           | 1           | 2              | 3               | 4            |
| GP7                            | Me veo obligado/a a pasar tiempo en la cama.....                         | 0           | 1           | 2              | 3               | 4            |

| <b><u>BIENESTAR SOCIAL/FAMILIAR</u></b> |                                                                                                                                                                                                                      | <b>Nada en absoluto</b> | <b>Algo</b> | <b>Un poco</b> | <b>Bastante</b> | <b>Mucho</b> |
|-----------------------------------------|----------------------------------------------------------------------------------------------------------------------------------------------------------------------------------------------------------------------|-------------------------|-------------|----------------|-----------------|--------------|
| GS1                                     | Me siento cercano/a a mis amigos.....                                                                                                                                                                                | 0                       | 1           | 2              | 3               | 4            |
| GS2                                     | Mi familia me apoya emocionalmente .....                                                                                                                                                                             | 0                       | 1           | 2              | 3               | 4            |
| GS3                                     | Mis amigos me apoyan.....                                                                                                                                                                                            | 0                       | 1           | 2              | 3               | 4            |
| GS4                                     | Mi familia ha aceptado mi enfermedad.....                                                                                                                                                                            | 0                       | 1           | 2              | 3               | 4            |
| GS5                                     | Me siento satisfecho/a con la comunicación sobre mi enfermedad.....                                                                                                                                                  | 0                       | 1           | 2              | 3               | 4            |
| GS6                                     | Me siento cercano/a a mi pareja (o persona que es mi principal apoyo) .....                                                                                                                                          | 0                       | 1           | 2              | 3               | 4            |
| Q1                                      | <i>Independientemente de su actual actividad sexual, por favor conteste a la siguiente pregunta. Si prefiere no contestar, por favor marque esta casilla <input type="checkbox"/> y pase a la siguiente sección.</i> |                         |             |                |                 |              |
| GS7                                     | Estoy satisfecho/a con mi vida sexual.....                                                                                                                                                                           | 0                       | 1           | 2              | 3               | 4            |

## FACIT-Pal

Por favor, rodee con un círculo o marque un número por fila para indicar su respuesta referida a los últimos 7 días.

| <u>BIENESTAR EMOCIONAL</u> |                                                                          | Nada | Algo | Un poco | Bastante | Mucho |
|----------------------------|--------------------------------------------------------------------------|------|------|---------|----------|-------|
| GE1                        | Me siento triste.....                                                    | 0    | 1    | 2       | 3        | 4     |
| GE2                        | Estoy satisfecho/a con la forma en que estoy llevando mi enfermedad..... | 0    | 1    | 2       | 3        | 4     |
| GE3                        | Estoy perdiendo la esperanza en la lucha contra mi enfermedad.....       | 0    | 1    | 2       | 3        | 4     |
| GE4                        | Estoy nervioso/a.....                                                    | 0    | 1    | 2       | 3        | 4     |
| GE5                        | Me preocupa morir .....                                                  | 0    | 1    | 2       | 3        | 4     |
| GE6                        | Me preocupa que mi condición empeore .....                               | 0    | 1    | 2       | 3        | 4     |

| <u>BIENESTAR FUNCIONAL</u> |                                                                       | Nada | Algo | Un poco | Bastante | Mucho |
|----------------------------|-----------------------------------------------------------------------|------|------|---------|----------|-------|
| GF1                        | Estoy en condiciones de trabajar (incluido el trabajo en casa)        | 0    | 1    | 2       | 3        | 4     |
| GF2                        | Mi trabajo (incluido el trabajo en casa) me resulta enriquecedor...   | 0    | 1    | 2       | 3        | 4     |
| GF3                        | Soy capaz de disfrutar de la vida.....                                | 0    | 1    | 2       | 3        | 4     |
| GF4                        | He aceptado mi enfermedad.....                                        | 0    | 1    | 2       | 3        | 4     |
| GF5                        | Duermo bien .....                                                     | 0    | 1    | 2       | 3        | 4     |
| GF6                        | Estoy disfrutando de las cosas que habitualmente hago por diversión . | 0    | 1    | 2       | 3        | 4     |
| GF7                        | Estoy contento/a con la calidad de vida que tengo ahora               | 0    | 1    | 2       | 3        | 4     |

# **FACTI-Pai**

Por favor, rodee con un círculo o marque un número por fila para indicar su respuesta referida a los últimos 7 días.

| <b><u>PREOCUPACIONES ADICIONALES</u></b> |                                                                                | <b>Nada</b> | <b>Algo</b> | <b>Un poco</b> | <b>Bastante</b> | <b>Mucho</b> |
|------------------------------------------|--------------------------------------------------------------------------------|-------------|-------------|----------------|-----------------|--------------|
| PAL1                                     | Mantengo el contacto con mis amigos.....                                       | 0           | 1           | 2              | 3               | 4            |
| PAL2                                     | Hay miembros de mi familia que asumirán mis responsabilidades.....             | 0           | 1           | 2              | 3               | 4            |
| PAL3                                     | Creo que mi familia me aprecia .....                                           | 0           | 1           | 2              | 3               | 4            |
| PAL4                                     | Siento que soy una carga para mi familia.....                                  | 0           | 1           | 2              | 3               | 4            |
| B1                                       | Me quedo sin aliento .....                                                     | 0           | 1           | 2              | 3               | 4            |
| PAL5                                     | Estoy estreñado/a .....                                                        | 0           | 1           | 2              | 3               | 4            |
| C2                                       | Estoy perdiendo peso.....                                                      | 0           | 1           | 2              | 3               | 4            |
| O2                                       | Estoy teniendo vómitos.....                                                    | 0           | 1           | 2              | 3               | 4            |
| PAL6                                     | Tengo inflamadas partes del cuerpo .....                                       | 0           | 1           | 2              | 3               | 4            |
| PAL7                                     | Mi boca y garganta están secas.....                                            | 0           | 1           | 2              | 3               | 4            |
| Bc7                                      | Me siento independiente.....                                                   | 0           | 1           | 2              | 3               | 4            |
| PAL8                                     | Me siento útil.....                                                            | 0           | 1           | 2              | 3               | 4            |
| PAL9                                     | Hago que cada día cuente.....                                                  | 0           | 1           | 2              | 3               | 4            |
| PAL10                                    | Tengo paz mental .....                                                         | 0           | 1           | 2              | 3               | 4            |
| Sp21                                     | Tengo esperanza .....                                                          |             | 1           | 2              | 3               | 4            |
| PAL12                                    | Soy capaz de tomar decisiones .....                                            | 0           | 1           | 2              | 3               | 4            |
| L1                                       | Tengo claridad de pensamiento.....                                             | 0           | 1           | 2              | 3               | 4            |
| PAL13                                    | He podido reconciliarme (hacer las paces) con algunas personas.....            | 0           | 1           | 2              | 3               | 4            |
| PAL14                                    | Puedo comentar abiertamente mis preocupaciones con personas cercanas a mí..... | 0           | 1           | 2              | 3               | 4            |

## FACIT-Pal-14

**A continuación, encontrará una lista de declaraciones que otras personas que padecen su misma enfermedad han considerado importantes. Por favor, rodee con un círculo o marque un número por fila para indicar su respuesta referida a los últimos 7 días.**

|       |                                                                                   | Nada | Algo | Un<br>poco | Bastante | Mucho |
|-------|-----------------------------------------------------------------------------------|------|------|------------|----------|-------|
| GP1   | Me siento farto/a de energía.....                                                 | 0    | 1    | 2          | 3        | 4     |
| GP2   | Tengo náuseas.....                                                                | 0    | 1    | 2          | 3        | 4     |
| GP4   | Tengo dolores .....                                                               | 0    | 1    | 2          | 3        | 4     |
| GE6   | Me preocupa que mi condición empeore .....                                        | 0    | 1    | 2          | 3        | 4     |
| GF3   | Soy capaz de disfrutar de la vida.....                                            | 0    | 1    | 2          | 3        | 4     |
| GF5   | Duermo bien .....                                                                 | 0    | 1    | 2          | 3        | 4     |
| GF7   | Estoy contento/a con la calidad de vida que tengo ahora.....                      | 0    | 1    | 2          | 3        | 4     |
| GS2   | Mi familia me apoya emocionalmente .....                                          | 0    | 1    | 2          | 3        | 4     |
| Sp21  | Tengo esperanza.....                                                              | 0    | 1    | 2          | 3        | 4     |
| GE1   | Me siento triste.....                                                             | 0    | 1    | 2          | 3        | 4     |
| Pa6   | Siento que soy una carga para mi familia.....                                     | 0    | 1    | 2          | 3        | 4     |
| Pa5   | Estoy estreñado/a.....                                                            | 0    | 1    | 2          | 3        | 4     |
| Pal14 | Puedo comentar abiertamente mis preocupaciones<br>con personas cercanas a mí..... | 0    | 1    | 2          | 3        | 4     |
| B1    | Me quedo sin aliento .....                                                        | 0    | 1    | 2          | 3        | 4     |
